# Supplementary material
Source: PubMed Central journal article supplement (PMC7606344)

## SUPPLEMENTAL MATERIAL

### Supplementary Methods.

**Discovery population:** The University of Maryland's Genetics of Early Onset Stroke (UMD-GEOS) Study is a population-based case-control study designed to identify genes associated with early-onset ischemic stroke and to characterize interactions of identified stroke genes and/or single nucleotide polymorphisms (SNPs) with environmental risk factors. Participants include men and women aged 18-49 from Baltimore-Washington, DC area, primarily of European-American (EA) and African-American (AA) ancestry and has been previously described<sup>3</sup> (see **Supplementary Table I**). In brief, incident ischemic stroke cases were matched to population-based controls free of stroke by age, ethnicity, gender, and geographic region. All subjects were interviewed for medical history and vascular risk factors; DNA was obtained from all subjects. All UMD-GEOS cases were subtyped by TOAST<sup>4</sup>. After exclusions, study subjects underwent genotyping on Illumina Human Exome Bead Chip v1.2 at the University of Texas-Houston (UT-H). Genotyping statistics included a SNP pass rate of 99.48% (successful-loci (n=243,497)/attempted-loci (n=244,770)) with 32,933 SNPs manually corrected. zCall\_v3.4\_GenomeStudio<sup>10</sup> was used to determine genotypes for any missing calls. Samples were removed if ancestry matched controls were unavailable or had cryptic relatedness to other study participants resulting in 723 cases and 726 controls.

**Power:** Here we discuss the Discovery population power for both single variant analysis and aggregate gene-based analysis. Based upon sample size limitations, this exome-chip association study was primarily designed to identify those exome variants, that when aggregated together within the corresponding gene, would exhibit significant association with stroke outcome.

First, for SINGLE variant association analysis with the 723 cases and 726 controls in our study, we have 80% power to detect associated low frequency and rare exome variants with minor allele frequency (MAF) less than 1% and effect size OR larger than 5 at exome-wide significance ( $p < 2.05E-7$ ), and 80% power to detect associated common exome variants with minor allele frequency (MAF) between 5-50% and effect size OR between 1.8~2.5 at exome-wide significance ( $p < 2.05E-7$ ). Our current study does not have sufficient power for exome variants (MAF < 1%) with low or rare frequency, as well as smaller effect size OR < 5. For those with effect size OR at least 3, a similar study would need at least 1880 cases and 1880 controls to detect the association at 80% power; for those with effect size OR at least 2, we would need at least 5550 case and 5550 control to achieve 80% power.

As described in the manuscript, GENE-based burden-testing evaluated for the association between all-stroke and TOAST-subtypes as outcomes with each gene. Only genes with two or more SNPs were included and with these genes further filtered to include those with a cumulative minor-allele-count  $\geq 20$  across all SNPs. To assess power, we carried out power simulations using the R SKAT package<sup>5</sup> and based on a simulated dataset in SKAT containing 200kb region with 10,000 haplotypes. The power is estimated as percent of SKAT-O tests on the 100 simulations reaching a Bonferroni corrected alpha level  $0.05/10,518 = 4.75E-6$  for multiple testing on 10,518 candidate genes (as consistent with our small vessel results). Assuming the percentage of casual rare SNPs within a gene being 30% or larger and with 723 ischemic stroke cases and 726 controls, we have >80% power to detect an associated gene with 25kb or longer

length and the effect size of the underlying SNPs (odds ratio, OR) larger than 2.0. With 123 small vessel strokes and 726 controls, we have >80% power to detect an associated gene with 40kb or longer length and the effect size of the underlying causal SNPs (odds ratio, OR) larger than 2.5. As a reference, we found that *NAT10* was significantly associated with small vessel stroke at exome wide significance, which has a gene length of 45.47kb.

**Genetic replication and extension to older-onset stroke:** Replication of the top-associated SNPs and genes identified in UMD-GEOS was sought in two other datasets including: 1) an independent set of early-onset-stroke studies from the Genetics-of-Early-Onset-Stroke-Consortium as previously described by Cheng *et al.*<sup>3</sup> ; 2) a large-scale genome-wide-association-study of primarily older-onset-stroke, MEGASTROKE.<sup>7</sup> First, we excluded the GEOS samples from the Cheng *et al.* meta-analysis (resulting in 3,676 cases and 21,118 controls) and re-meta-analyzed the data. Additionally, we surveyed summary results from the large predominately older-onset stroke study MEGASTROKE (67,162 cases and 454,450 controls) that included GEOS samples as a very small subset.

**Supplementary Table I. Characteristics of the UM-GEOS study by case-control status.**

|                                          | <b>Cases</b> | <b>Controls</b> | <b>P-value*</b> |
|------------------------------------------|--------------|-----------------|-----------------|
| Samples with Exome Chip (and prior GWAS) | 723          | 726             |                 |
| Age (mean +- SD, years)                  | 39.8+6.8     | 41.9 + 6.7      | <0.001          |
| Female (%)                               | 37.3         | 39.7            | 0.363           |
| <b>Self-reported race</b>                |              |                 | 0.078           |
| African ancestry (n= 628)                | 330          | 298             |                 |
| European Ancestry (n=821)                | 393          | 428             |                 |
| <b>Stroke Subtype n (%)</b>              |              |                 |                 |
| Cardioembolic                            | 141 (19.4)   | -               | -               |
| Large-Artery                             | 52 (7.2)     | -               | -               |
| Lacunar/Small-Vessel                     | 123 (16.9)   | -               | -               |
| Other Known Causes                       | 39 (5.4)     | -               | -               |
| Undetermined Causes                      | 368 (50.7)   | -               | -               |
| <b>Hypertension (%)</b>                  | 21.8         | 10.2            | <0.001          |
| <b>Diabetes mellitus (%)</b>             | 8.8          | 2.4             | <0.001          |
| <b>Angina/ MI (%)</b>                    | 0.3          | 2.8             | 0.38            |
| <b>Current Smokers (%)</b>               | 22.2         | 14.2            | <0.001          |

\*Unadjusted p-values for age and sex; other variables adjusted for age and sex.

**Supplementary Table II. Single-variant Ancestry-specific Results for All-Stroke and Subtypes.**

| Population            | Chr | BP        | SNP         | Gene                  | EA* | EAF** | OR    | SE     | L95    | U95    | P        |
|-----------------------|-----|-----------|-------------|-----------------------|-----|-------|-------|--------|--------|--------|----------|
| <b>All-Stroke</b>     |     |           |             |                       |     |       |       |        |        |        |          |
| European-American     | 4   | 184612553 | rs67383011  | <i>TRAPC11</i>        | C   | 0.09  | 0.43  | 0.183  | 0.30   | 0.62   | 5.19E-06 |
|                       | 15  | 59981515  | rs3087328   | <i>BNIP2</i>          | G   | 0.42  | 1.54  | 0.105  | 1.25   | 1.89   | 3.42E-05 |
|                       | 15  | 59981590  | rs754641    | <i>BNIP2</i>          | A   | 0.43  | 1.54  | 0.104  | 1.25   | 1.89   | 3.42E-05 |
|                       | 9   | 100696203 | rs755109    | <i>HEMGN</i>          | C   | 0.37  | 1.54  | 0.107  | 1.24   | 1.89   | 5.91E-05 |
|                       | 9   | 100684757 | rs3183927   | <i>TRMO</i>           | G   | 0.37  | 1.52  | 0.106  | 1.23   | 1.87   | 8.96E-05 |
| African-American      | 1   | 55304970  | rs7549251   | <i>LEXM</i>           | G   | 0.61  | 1.65  | 0.118  | 1.30   | 2.08   | 2.35E-05 |
|                       | 11  | 6790028   | rs10839616  | <i>OR2AG2</i>         | G   | 0.33  | 1.71  | 0.133  | 1.31   | 2.22   | 5.52E-05 |
|                       | 1   | 165702346 | rs12723198  | <i>TMCO1</i>          | C   | 0.47  | 1.59  | 0.121  | 1.25   | 2.02   | 1.31E-04 |
|                       | 5   | 178381722 | rs57272473  | <i>ZNF454</i>         | T   | 0.58  | 1.55  | 0.117  | 1.23   | 1.94   | 1.73E-04 |
|                       | 5   | 89989802  | rs111033430 | <i>GPR98</i>          | G   | 0.067 | 2.67  | 0.264  | 1.59   | 4.48   | 1.91E-04 |
| <b>Cardio-embolic</b> |     |           |             |                       |     |       |       |        |        |        |          |
| European-American     | 2   | 179569387 | rs72650006  | <i>TTN</i>            | A   | 0.02  | 6.012 | 0.4289 | 2.594  | 13.94  | 2.88E-05 |
|                       | 19  | 53612055  | rs10410030  | <i>ZNF415</i>         | C   | 0.17  | 2.474 | 0.225  | 1.592  | 3.845  | 5.68E-05 |
|                       | 1   | 248496863 | rs4481887   | <i>OR2M7</i>          | A   | 0.26  | 2.096 | 0.1956 | 1.429  | 3.075  | 0.000155 |
|                       | 14  | 20444012  | rs3861512   | <i>OR4K15</i>         | T   | 0.23  | 2.056 | 0.1958 | 1.401  | 3.018  | 0.000231 |
|                       | 10  | 14974905  | rs12768894  | <i>DCLRE1C</i>        | C   | 0.17  | 2.207 | 0.2152 | 1.448  | 3.365  | 0.000235 |
| African-American      | 12  | 10342736  | rs78737759  | <i>TMEM52B</i>        | A   | 0.05  | 4.673 | 0.3636 | 2.291  | 9.531  | 2.23E-05 |
|                       | 17  | 72691928  | rs2034310   | <i>CD300LF</i>        | T   | 0.38  | 0.373 | 0.2436 | 0.2312 | 0.6007 | 5.07E-05 |
|                       | 13  | 36122567  | rs4606576   | <i>MIR548F5</i>       | C   | 0.28  | 0.461 | 0.2067 | 0.3071 | 0.6906 | 0.000176 |
|                       | 16  | 81010073  | rs1127390   | <i>CMC2</i>           | T   | 0.40  | 0.447 | 0.22   | 0.2905 | 0.6883 | 0.000255 |
|                       | 1   | 173915909 | rs61741479  | <i>RC3H1</i>          | C   | 0.04  | 3.965 | 0.3799 | 1.883  | 8.349  | 0.000288 |
| <b>Small-Vessel</b>   |     |           |             |                       |     |       |       |        |        |        |          |
| European-American     | 18  | 46645157  | rs138427861 | <i>DYM</i>            | T   | 0.004 | 58.72 | 1.039  | 7.664  | 449.8  | 8.84E-05 |
|                       | 3   | 180104190 | rs7612449   | <i>TTC14</i>          | T   | 0.022 | 11.19 | 0.6188 | 3.328  | 37.64  | 9.50E-05 |
|                       | 15  | 41488231  | rs139947718 | <i>EXD1</i>           | C   | 0.005 | 69.58 | 1.109  | 7.919  | 611.4  | 0.000130 |
|                       | 13  | 103513944 | rs1047769   | <i>BIVM<br/>ERCC5</i> | G   | 0.04  | 6.161 | 0.4808 | 2.401  | 15.81  | 0.000156 |
|                       | 16  | 58752137  | rs139235307 | <i>GOT2</i>           | T   | 0.02  | 10.18 | 0.6179 | 3.032  | 34.17  | 0.000173 |
| African-American      | 20  | 31024013  | rs75887545  | <i>ASXL1</i>          | G   | 0.024 | 21.19 | 0.7233 | 5.135  | 87.47  | 2.42E-05 |
|                       | 1   | 55317935  | rs11555496  | <i>DHCR24</i>         | T   | 0.03  | 8.922 | 0.5552 | 3.005  | 26.49  | 8.09E-05 |
|                       | 19  | 33698291  | rs3745974   | <i>LRP3</i>           | T   | 0.35  | 0.377 | 0.2551 | 0.2284 | 0.6209 | 0.000129 |
|                       | 1   | 117617973 | rs34334470  | <i>TTF2</i>           | G   | 0.02  | 12.46 | 0.6645 | 3.388  | 45.83  | 0.000147 |
|                       | 17  | 46053353  | rs12948207  | <i>CDK5RAP3</i>       | A   | 0.08  | 3.614 | 0.3489 | 1.824  | 7.161  | 0.000231 |
| <b>Large-Artery</b>   |     |           |             |                       |     |       |       |        |        |        |          |
| European-American     | 15  | 81578139  | rs4072111   | <i>IL16</i>           | T   | 0.12  | 5.406 | 0.3958 | 2.489  | 11.74  | 2.01E-05 |
|                       | 2   | 85590286  | rs7564372   | <i>ELMOD3</i>         | T   | 0.02  | 38.21 | 0.8685 | 6.965  | 209.7  | 2.73E-05 |
|                       | 2   | 189918622 | rs116298748 | <i>COL5A2</i>         | A   | 0.02  | 9.293 | 0.5757 | 3.007  | 28.72  | 0.000108 |
|                       | 2   | 189931144 | rs35852101  | <i>COL5A2</i>         | G   | 0.02  | 9.293 | 0.5757 | 3.007  | 28.72  | 0.000108 |
|                       | 15  | 98490612  | rs4965115   | <i>ARRDC4</i>         | T   | 0.22  | 3.154 | 0.3006 | 1.75   | 5.686  | 0.000133 |
| African-American      | 4   | 3494898   | rs6850908   | <i>DOK7</i>           | T   | 0.06  | 16.31 | 0.5801 | 5.233  | 50.85  | 1.49E-06 |
|                       | 4   | 3494600   | rs6811423   | <i>DOK7</i>           | G   | 0.06  | 15.91 | 0.6019 | 4.891  | 51.78  | 4.28E-06 |
|                       | 21  | 35186290  | rs147036952 | <i>ITSN1</i>          | A   | 0.01  | 57.66 | 0.9286 | 9.342  | 355.8  | 1.26E-05 |

|                     |    |           |             |                  |   |       |       |        |        |        |          |
|---------------------|----|-----------|-------------|------------------|---|-------|-------|--------|--------|--------|----------|
|                     | 21 | 34889697  | rs34588874  | <i>GART</i>      | C | 0.02  | 19.32 | 0.6928 | 4.969  | 75.1   | 1.92E-05 |
|                     | 19 | 33356891  | rs12460876  | <i>SLC7A9</i>    | C | 0.28  | 5.499 | 0.4132 | 2.447  | 12.36  | 3.69E-05 |
| <b>Other Known</b>  |    |           |             |                  |   |       |       |        |        |        |          |
| European-American   | 2  | 43902763  | rs148112877 | <i>LOC728819</i> | C | 0.016 | 17.87 | 0.6763 | 4.748  | 67.27  | 2.01E-05 |
|                     | 19 | 50720949  | rs34773557  | <i>MYH14</i>     | A | 0.007 | 38.25 | 0.8711 | 6.936  | 210.9  | 2.88E-05 |
|                     | 2  | 99005601  | rs6743554   | <i>CNGA3</i>     | C | 0.36  | 4.497 | 0.36   | 2.22   | 9.107  | 2.98E-05 |
|                     | 5  | 140774689 | rs72790033  | <i>PCDHGA8</i>   | C | 0.36  | 7.026 | 0.5029 | 2.622  | 18.83  | 0.000106 |
|                     | 16 | 11272287  | rs72650688  | <i>CLEC16A</i>   | A | 0.004 | 99.03 | 1.187  | 9.67   | 1014   | 0.000108 |
| African-American    | 20 | 20071521  | rs111472581 | <i>CFAP61</i>    | A | 0.02  | 20.18 | 0.7122 | 4.997  | 81.49  | 2.45E-05 |
|                     | 6  | 43519174  | rs61739889  | <i>XPO5</i>      | C | 0.02  | 22.1  | 0.7404 | 5.179  | 94.34  | 2.90E-05 |
|                     | 14 | 71514668  | rs78161372  | <i>PCNX</i>      | C | 0.01  | 48.17 | 0.9541 | 7.425  | 312.6  | 4.88E-05 |
|                     | 8  | 120007420 | rs2062377   | <i>COLEC10</i>   | A | 0.14  | 7.419 | 0.505  | 2.757  | 19.96  | 7.25E-05 |
|                     | 3  | 38101245  | rs34012183  | <i>DLEC1</i>     | T | 0.05  | 10.17 | 0.5924 | 3.186  | 32.49  | 8.99E-05 |
| <b>Undetermined</b> |    |           |             |                  |   |       |       |        |        |        |          |
| European-American   | 20 | 6093177   | rs16991866  | <i>FERMT1</i>    | G | 0.12  | 2.212 | 0.1829 | 1.546  | 3.166  | 1.43E-05 |
|                     | 20 | 6088265   | rs62200482  | <i>FERMT1</i>    | A | 0.11  | 2.24  | 0.1862 | 1.555  | 3.226  | 1.48E-05 |
|                     | 4  | 184612553 | rs67383011  | <i>TRAPPC11</i>  | C | 0.10  | 0.338 | 0.2534 | 0.2056 | 0.555  | 1.84E-05 |
|                     | 5  | 156609000 | rs411174    | <i>ITK</i>       | T | 0.31  | 1.704 | 0.1282 | 1.326  | 2.191  | 3.17E-05 |
|                     | 15 | 59981515  | rs3087328   | <i>BNIP2</i>     | G | 0.42  | 1.694 | 0.1276 | 1.319  | 2.175  | 3.66E-05 |
| African-American    | 1  | 55304970  | rs7549251   | <i>C1orf177</i>  | G | 0.39  | 1.965 | 0.1519 | 1.459  | 2.647  | 8.74E-06 |
|                     | 3  | 195489009 | rs2246901   | <i>MUC4</i>      | C | 0.49  | 0.529 | 0.1589 | 0.3871 | 0.7217 | 6.01E-05 |
|                     | 5  | 112849627 | rs116615892 | <i>YTHDC2</i>    | T | 0.02  | 9.551 | 0.6012 | 2.94   | 31.03  | 0.000174 |
|                     | 1  | 59799161  | rs17119280  | <i>FGGY</i>      | A | 0.08  | 2.609 | 0.2559 | 1.58   | 4.309  | 0.000179 |
|                     | 11 | 6790028   | rs10839616  | <i>OR2AG2</i>    | G | 0.33  | 1.802 | 0.163  | 1.31   | 2.481  | 0.000301 |

\*EA= effect allele; \*\*EAF refers to effect allele frequency in the study population

**Supplementary Table III. Fixed- and Random-Effects Meta-Analysis Results.**

| Type          | Chr | BP        | SNP         | Gene                   | EA | EAF (AFR/EUR)     | P Fixed   | P Random  | OR Fixed | OR Random | Q      |
|---------------|-----|-----------|-------------|------------------------|----|-------------------|-----------|-----------|----------|-----------|--------|
| All-Stroke    | 1   | 55304970  | rs7549251   | <i>LEXM (C1orf177)</i> | G  | 0.3912/0.3776     | 4.08E-07  | 3.32E-06  | 1.4993   | 1.5011    | 0.2751 |
|               | 4   | 184612553 | rs67383011  | <i>TRAPPC11</i>        | C  | 0.04864/0.09866   | 5.19E-06  | 0.00389   | 0.5013   | 0.5225    | 0.1601 |
|               | 7   | 12406989  | rs6460939   | <i>VWDE</i>            | G  | 0.4522/0.4616     | 8.79E-06  | 8.79E-06  | 1.4147   | 1.4147    | 0.9893 |
|               | 8   | 120052238 | rs6993813   | <i>COLEC10</i>         | T  | 0.2544/0.4762     | 2.60E-05  | 2.60E-05  | 1.4167   | 1.4167    | 0.8696 |
| Cardioembolic | 9   | 139111870 | rs7849585   | <i>QSOX2</i>           | G  | 0.2384/0.3313     | 5.32E-05  | 5.32E-05  | 0.7109   | 0.7109    | 0.8392 |
|               | 16  | 81010073  | rs1127390   | <i>CMC2</i>            | T  | 0.4019/0.2156     | 5.28E-05  | 5.28E-05  | 0.5179   | 0.5179    | 0.3212 |
|               | 11  | 34637669  | rs10836265  | <i>EHF</i>             | A  | 0.1411/0.3776     | 6.08E-05  | 0.001202  | 1.8553   | 1.8953    | 0.2128 |
|               | 11  | 120152591 | rs11217785  | <i>POU2F3</i>          | T  | 0.3756/0.2229     | 0.0001877 | 0.0001877 | 1.6794   | 1.6794    | 0.9829 |
|               | 1   | 161681780 | rs2275603   | <i>FCRLA</i>           | G  | 0.3684/0.2071     | 0.000258  | 0.000258  | 1.7397   | 1.7397    | 0.3422 |
|               | 8   | 38095662  | rs2306899   | <i>DDHD2</i>           | T  | 0.05263/0.24      | 0.0002635 | 0.0002635 | 1.9208   | 1.9208    | 0.3346 |
| Large-Artery  | 4   | 88534065  | rs3750025   | <i>DSPP</i>            | A  | 0.01994/0.02558   | 1.78E-05  | 1.78E-05  | 7.3028   | 7.3028    | 0.5095 |
|               | 2   | 85590286  | rs7564372   | <i>ELMOD3</i>          | T  | 0.1746/0.01644    | 4.42E-05  | 0.0946    | 4.1382   | 9.063     | 0.0052 |
|               | 5   | 115175503 | rs6594908   | <i>ATG12</i>           | G  | 0.4258/0.00609    | 4.57E-05  | 4.57E-05  | 4.3846   | 4.3846    | 0.421  |
|               | 4   | 3494898   | rs6850908   | <i>DOK7</i>            | T  | 0.0638/0.2144     | 6.89E-05  | 0.1331    | 2.9793   | 5.1667    | 0.0009 |
|               | 8   | 27321189  | rs56229264  | <i>CHRNA2</i>          | A  | 0.00319/0.02134   | 9.55E-05  | 9.55E-05  | 8.7194   | 8.7194    | 0.3506 |
| Small-Vessel  | 9   | 104020751 | rs1329071   | <i>LPPR1</i>           | T  | 0.2663/0.4123     | 3.85E-05  | 3.85E-05  | 1.9029   | 1.9029    | 0.5609 |
|               | 3   | 147959286 | rs1495327   | <i>AGTR1</i>           | G  | 0.4912/0.257      | 0.0001439 | 0.0001439 | 1.8125   | 1.8125    | 0.9273 |
|               | 4   | 44682465  | rs6447368   | <i>GUF1</i>            | C  | 0.3485/0.3928     | 0.0001984 | 0.0001984 | 1.7869   | 1.7869    | 0.6251 |
|               | 9   | 139111870 | rs7849585   | <i>QSOX2</i>           | G  | 0.2384/0.3313     | 0.0002393 | 0.0002393 | 0.5323   | 0.5331    | 0.2686 |
|               | 2   | 34480075  | rs6733379   | <i>LINC01317</i>       | G  | 0.319/0.2868      | 0.0002403 | 0.0002403 | 1.8151   | 1.8151    | 0.5143 |
| Other Known   | 20  | 20071521  | rs111472581 | <i>CFAP61</i>          | A  | 0.02233/0.004872  | 1.81E-06  | 1.81E-06  | 20.351   | 20.351    | 0.9796 |
|               | 22  | 41574383  | rs1046088   | <i>EP300</i>           | C  | 0.004785/0.03776  | 7.18E-05  | 7.18E-05  | 6.397    | 6.397     | 0.582  |
|               | 17  | 3981290   | rs78806449  | <i>ZZEF1</i>           | G  | 0.0311/0.0609     | 7.69E-05  | 7.69E-05  | 5.6636   | 5.6636    | 0.6814 |
|               | 11  | 7324584   | rs78477754  | <i>SYT9</i>            | A  | 0.01834/0.02619   | 0.0001165 | 0.0001165 | 6.2698   | 6.2698    | 0.6026 |
| Undetermined  | 2   | 47287925  | rs140166160 | <i>TTC7A</i>           | A  | 0.003987/0.007308 | 0.000117  | 0.000117  | 21.2573  | 21.2573   | 0.4615 |
|               | 1   | 55304970  | rs7549251   | <i>C1orf177</i>        | G  | 0.3912/0.3776     | 1.43E-07  | 9.85E-05  | 1.68E+00 | 1.695     | 0.1724 |
|               | 4   | 184612553 | rs67383011  | <i>TRAPPC11</i>        | C  | 0.04864/0.09866   | 1.17E-05  | 4.76E-04  | 0.3996   | 0.4104    | 0.2396 |
|               | 3   | 38766675  | rs6795970   | <i>SCN10A</i>          | A  | 0.07735/0.3995    | 4.54E-05  | 4.54E-05  | 1.58E+00 | 1.5787    | 0.5585 |
|               | 3   | 38774832  | rs6800541   | <i>SCN10A</i>          | C  | 0.07815/0.4026    | 5.43E-05  | 5.43E-05  | 1.57E+00 | 1.5731    | 0.5013 |
|               | 3   | 151579873 | rs6798928   | <i>AADA2L-AS1</i>      | A  | 0.1914/0.4233     | 8.57E-05  | 8.57E-05  | 6.57E-01 | 0.6565    | 0.8866 |

EA= effect allele; EAF=effect allele frequency in study population (AFR/EUR); OR=Odds Ratio; Q=Cochran's Q.

**Supplementary Table IV. Top 10 Pathway analysis results for all-stroke implementing gene-burden test results.**

| Ingenuity Pathways                                               | P-value  | Molecules                                                         |
|------------------------------------------------------------------|----------|-------------------------------------------------------------------|
| Tryptophan Degradation III                                       | 6.92E-06 | ACAT2, EHHADH, HSD17B8, IDO1, KMO, KYNU                           |
| Tryptophan Degradation to 2-amino-3-carboxymuconate Semialdehyde | 4.37E-04 | IDO1, KMO, KYNU                                                   |
| Fatty Acid $\beta$ -oxidation I                                  | 4.37E-04 | ACAA1, EHHADH, HSD17B8, SLC27A4, SLC27A5                          |
| Cholesterol Biosynthesis I                                       | 2.09E-03 | DHCR24, FDFT1, LSS                                                |
| Superpathway of Cholesterol Biosynthesis                         | 2.34E-03 | ACAT2, DHCR24, FDFT1, LSS                                         |
| NAD biosynthesis II (from tryptophan)                            | 3.24E-03 | IDO1, KMO, KYNU                                                   |
| Glutaryl-CoA Degradation                                         | 3.24E-03 | ACAT2, EHHADH, HSD17B8                                            |
| Type II Diabetes Mellitus Signaling                              | 4.57E-03 | FGFR1, MAP3K1, PIK3CG, PIK3R2, SLC27A4, SLC27A5, SMPD1, TNFRSF11B |
| HMGB1 Signaling                                                  | 6.03E-03 | CNTF, CSF2, FGFR1, IL3, MAP2K3, PIK3CG, PIK3R2, TNFRSF11B         |
| p53 Signaling                                                    | 7.76E-03 | ATR, FGFR1, PIK3CG, PIK3R2, TNFRSF10A, TP53AIP1, TRIM29           |

**Supplementary Table V. NAT10 SNPs evaluated on Exome-Chip in GEOS (highlighted in yellow) and NAT10 GWAS lookups in the Young-Onset Stroke Consortium and MEGASTROKE as ordered by SNP location 5' to 3', with significantly associated (p<0.05) 'replication' SNPs (highlighted in green).**

Notably, there were no direct SNP overlaps between the exome chip and GWA studies, as the GWA content includes primarily common variants, while the exome chip includes primarily rare variants.

NA – indicates not available or non-calculable.

**Table header description:**

RsNum- dbSNP ID,

Position – position in Human Genome Browser - hg19 assembly,

Ref - reference allele,

Alt -alternate allele,

Type - type of variant,

Function,

AA change,

Early\_META\_no\_GEOS - GEOS excluded from ***Cheng et al. meta-analysis***<sup>3</sup>,

MEGA\_EUR\_SV – **MEGASTROKE**<sup>5</sup> EUROPEAN small vessel summary result,

MEGA\_TRANS\_SV – **MEGASTROKE**<sup>5</sup> TRANS-ETHNIC small vessel summary result,

SV\_META- single variant result from **GEOS** exome chip,

SV\_META\_population – **GEOS** population specific result reported,

1kg\_ALL- minor allele frequency in 1000G all populations,

1kg\_AFR - minor allele frequency in AFR samples of 1000 Genomes,

1kg\_EUR - minor allele frequency in EUR samples of 1000 Genomes,

ESP\_ALL - minor allele frequency in Exome Sequencing Project all samples,

ESP\_AA - minor allele frequency in Exome Sequencing Project African-American samples,

ESP\_EA - minor allele frequency in Exome Sequencing Project European-American samples.

| rsNum       | Position | Ref | Alt | Type       | Function   | AAChg | Early_META_no_GEOS | MEGA_EUR_SV | MEGA_TRANS_SV | SV_META      | SV_META_pop | 1kg_ALL  | 1kg_AFR  | 1kg_EUR | ESP_ALL  | ESP_AA | ESP_EA |
|-------------|----------|-----|-----|------------|------------|-------|--------------------|-------------|---------------|--------------|-------------|----------|----------|---------|----------|--------|--------|
| rs11436298  | 34125240 | C   | T   | intergenic | NA         | NA    | 0.087917           | 0.9557      | 0.4215        | NA           | NA          | 0.0835   | 0.1823   | 0.0775  | NA       | NA     | NA     |
| rs73501048  | 34125873 | T   | A   | intergenic | NA         | NA    | 0.098647           | 0.9499      | 0.4448        | NA           | NA          | 0.0907   | 0.2042   | 0.0805  | NA       | NA     | NA     |
| rs80155580  | 34125887 | C   | A   | intergenic | NA         | NA    | 0.082883           | 0.914       | 0.467         | NA           | NA          | 0.0607   | 0.0968   | 0.0775  | NA       | NA     | NA     |
| rs16925170  | 34126170 | C   | T   | upstream   | NA         | NA    | 0.084463           | 0.8919      | 0.462         | NA           | NA          | 0.0835   | 0.1823   | 0.0775  | NA       | NA     | NA     |
| rs16925173  | 34126533 | G   | C   | upstream   | NA         | NA    | 0.087825           | 0.8674      | 0.4872        | NA           | NA          | 0.0833   | 0.1815   | 0.0775  | NA       | NA     | NA     |
| rs1883958   | 34127122 | C   | G   | UTR5       | NA         | NA    | 0.074237           | 0.9686      | NA            | NA           | NA          | 0.0369   | 0.0083   | 0.0775  | NA       | NA     | NA     |
| rs16925175  | 34127463 | T   | C   | intronic   | NA         | NA    | 0.045241           | 0.8447      | 0.5021        | NA           | NA          | 0.0835   | 0.1823   | 0.0775  | NA       | NA     | NA     |
| rs79446413  | 34127472 | A   | T   | intronic   | NA         | NA    | 0.041544           | 0.9991      | 0.5395        | NA           | NA          | 0.0609   | 0.0976   | 0.0775  | NA       | NA     | NA     |
| rs79275993  | 34127657 | C   | G   | intronic   | NA         | NA    | 0.625935           | NA          | NA            | NA           | NA          | 0.0028   | NA       | 0.0129  | NA       | NA     | NA     |
| rs79275993  | 34127657 | C   | T   | intronic   | NA         | NA    | 0.625935           | NA          | NA            | NA           | NA          | NA       | NA       | NA      | NA       | NA     | NA     |
| rs16925177  | 34127839 | A   | G   | intronic   | NA         | NA    | 0.087796           | 0.8669      | 0.4854        | NA           | NA          | 0.0835   | 0.1823   | 0.0775  | NA       | NA     | NA     |
| rs73501059  | 34128031 | A   | G   | intronic   | NA         | NA    | 0.087027           | 0.8357      | 0.4934        | NA           | NA          | 0.0649   | 0.1127   | 0.0775  | NA       | NA     | NA     |
| rs2024624   | 34128208 | G   | C   | intronic   | NA         | NA    | 0.107332           | 0.7314      | NA            | NA           | NA          | 0.0094   | 0.0023   | 0.0278  | NA       | NA     | NA     |
| rs117850996 | 34128782 | T   | G   | intronic   | NA         | NA    | 0.347467           | 0.112       | NA            | NA           | NA          | 0.0146   | NA       | 0.0249  | NA       | NA     | NA     |
| rs75300173  | 34128942 | A   | G   | intronic   | NA         | NA    | 0.890912           | 0.04587     | NA            | NA           | NA          | 0.003    | NA       | 0.0119  | NA       | NA     | NA     |
| rs75129511  | 34129040 | C   | T   | intronic   | NA         | NA    | 0.082692           | 0.9988      | 0.5409        | NA           | NA          | 0.0609   | 0.0976   | 0.0775  | NA       | NA     | NA     |
| rs77103524  | 34129201 | A   | G   | intronic   | NA         | NA    | 0.087723           | 0.8668      | 0.4855        | NA           | NA          | 0.0833   | 0.1823   | 0.0765  | NA       | NA     | NA     |
| rs11032515  | 34129394 | C   | T   | intronic   | NA         | NA    | 0.329881           | 0.2658      | 0.1024        | NA           | NA          | 0.2097   | 0.0923   | 0.2286  | NA       | NA     | NA     |
| rs113967792 | 34129399 | C   | A   | intronic   | NA         | NA    | 0.086995           | 0.8492      | 0.485         | NA           | NA          | 0.0647   | 0.1127   | 0.0765  | NA       | NA     | NA     |
| rs140188192 | 34129779 | C   | T   | exonic     | missense   | R3W   | NA                 | NA          | NA            | NA           | NA          | 4.00E-04 | NA       | 0.002   | 0.001231 | 0.0007 | 0.0015 |
| rs78307936  | 34130015 | C   | G   | intronic   | NA         | NA    | 0.866419           | 0.0221      | NA            | NA           | NA          | 0.0727   | 0.1051   | 0.1074  | NA       | NA     | NA     |
| rs73501064  | 34130164 | A   | G   | intronic   | NA         | NA    | 0.092457           | 0.9534      | 0.4358        | NA           | NA          | 0.0843   | 0.1823   | 0.0805  | NA       | NA     | NA     |
| rs73501065  | 34130195 | G   | A   | intronic   | NA         | NA    | 0.098385           | 0.9481      | 0.4452        | NA           | NA          | 0.0907   | 0.2042   | 0.0805  | NA       | NA     | NA     |
| rs11552143  | 34130342 | A   | G   | exonic     | synonymous | S54S  | 0.085249           | 0.8435      | 0.4835        | NA           | NA          | 0.0649   | 0.1127   | 0.0775  | 0.091846 | 0.0904 | 0.0926 |
| rs17700360  | 34130406 | A   | G   | intronic   | NA         | NA    | 0.086903           | 0.8563      | 0.4807        | NA           | NA          | 0.0649   | 0.1127   | 0.0775  | 0.091846 | 0.0904 | 0.0926 |
| rs16925181  | 34131716 | C   | T   | intronic   | NA         | NA    | 0.045048           | 0.9246      | 0.451         | NA           | NA          | 0.0835   | 0.1823   | 0.0775  | NA       | NA     | NA     |
| rs116967665 | 34131795 | G   | A   | intronic   | NA         | NA    | 0.27289            | 0.8802      | NA            | NA           | NA          | 0.007    | 0.0023   | 0.0209  | NA       | NA     | NA     |
| rs73501069  | 34131901 | A   | G   | intronic   | NA         | NA    | 0.045036           | 0.8622      | 0.4894        | NA           | NA          | 0.0835   | 0.1823   | 0.0775  | NA       | NA     | NA     |
| rs75953991  | 34132557 | G   | A   | intronic   | NA         | NA    | 0.082486           | 0.9966      | 0.5374        | NA           | NA          | 0.0611   | 0.0983   | 0.0775  | NA       | NA     | NA     |
| rs16925182  | 34132964 | C   | G   | intronic   | NA         | NA    | 0.087395           | 0.8687      | 0.4837        | NA           | NA          | 0.0835   | 0.1823   | 0.0775  | NA       | NA     | NA     |
| rs73501073  | 34133552 | T   | C   | intronic   | NA         | NA    | 0.086906           | 0.8461      | 0.5003        | NA           | NA          | 0.0835   | 0.1823   | 0.0775  | 0.106846 | 0.1351 | 0.0924 |
| rs79517378  | 34133586 | T   | C   | intronic   | NA         | NA    | 0.117526           | 0.7925      | 0.373         | NA           | NA          | 0.0835   | 0.1823   | 0.0775  | 0.047231 | 0.0681 | 0.0365 |
| rs78574770  | 34133587 | G   | A   | intronic   | NA         | NA    | 0.110436           | 0.7949      | 0.3584        | NA           | NA          | 0.0835   | 0.1823   | 0.0775  | 0.052385 | 0.0745 | 0.0411 |
| rs17778759  | 34134698 | G   | A   | intronic   | NA         | NA    | 0.081032           | 0.9997      | 0.538         | NA           | NA          | 0.0607   | 0.0968   | 0.0775  | NA       | NA     | NA     |
| rs16925183  | 34134892 | A   | G   | intronic   | NA         | NA    | 0.096111           | 0.9563      | 0.4352        | NA           | NA          | 0.0847   | 0.1838   | 0.0805  | NA       | NA     | NA     |
| rs10836156  | 34134926 | C   | T   | intronic   | NA         | NA    | 0.75177            | 0.04172     | 0.007311      | NA           | NA          | 0.3652   | 0.3812   | 0.4036  | NA       | NA     | NA     |
| rs74497402  | 34135072 | A   | G   | intronic   | NA         | NA    | 0.086778           | 0.8529      | 0.4964        | NA           | NA          | 0.0835   | 0.1823   | 0.0775  | NA       | NA     | NA     |
| rs201730594 | 34135273 | C   | G   | exonic     | missense   | A56G  | NA                 | NA          | NA            | NA           | NA          | 2.00E-04 | 8.00E-04 | NA      | NA       | NA     | NA     |
| rs2957481   | 34136028 | T   | C   | intronic   | NA         | NA    | 0.097591           | 0.8295      | 0.5432        | NA           | NA          | 0.8942   | 0.7398   | 0.9195  | NA       | NA     | NA     |
| rs112380660 | 34136096 | A   | G   | intronic   | NA         | NA    | 0.080786           | 0.9963      | 0.5344        | NA           | NA          | 0.0607   | 0.0968   | 0.0775  | NA       | NA     | NA     |
| rs117309058 | 34136307 | G   | A   | intronic   | NA         | NA    | 0.572844           | 0.6374      | NA            | NA           | NA          | 0.0214   | 0.0015   | 0.0775  | NA       | NA     | NA     |
| rs181755346 | 34136544 | A   | G   | intronic   | NA         | NA    | 0.045623           | NA          | NA            | NA           | NA          | 0.0024   | NA       | 0.005   | NA       | NA     | NA     |
| rs60494596  | 34137087 | G   | A   | intronic   | NA         | NA    | 0.085671           | 0.8658      | 0.4836        | NA           | NA          | 0.0835   | 0.1823   | 0.0775  | NA       | NA     | NA     |
| rs79996353  | 34137524 | G   | A   | intronic   | NA         | NA    | 0.08077            | 0.9997      | 0.5378        | NA           | NA          | 0.0607   | 0.0968   | 0.0775  | NA       | NA     | NA     |
| rs60015864  | 34137686 | T   | C   | intronic   | NA         | NA    | 0.043601           | 0.867       | 0.4822        | NA           | NA          | 0.0835   | 0.1823   | 0.0775  | NA       | NA     | NA     |
| rs58755000  | 34137713 | T   | C   | intronic   | NA         | NA    | 0.043599           | 0.8669      | 0.4822        | NA           | NA          | 0.0835   | 0.1823   | 0.0775  | NA       | NA     | NA     |
| rs16925184  | 34137875 | G   | A   | intronic   | NA         | NA    | 0.043584           | 0.8656      | 0.4836        | NA           | NA          | 0.0835   | 0.1823   | 0.0775  | NA       | NA     | NA     |
| rs80179115  | 34137932 | T   | C   | intronic   | NA         | NA    | 0.040027           | 0.9957      | 0.5408        | NA           | NA          | 0.0607   | 0.0968   | 0.0775  | NA       | NA     | NA     |
| rs56693007  | 34138028 | C   | T   | intronic   | NA         | NA    | 0.0436             | 0.8646      | 0.4849        | NA           | NA          | 0.0835   | 0.1823   | 0.0775  | NA       | NA     | NA     |
| rs57492451  | 34138451 | A   | G   | intronic   | NA         | NA    | 0.043079           | 0.8565      | 0.4763        | NA           | NA          | 0.0651   | 0.1135   | 0.0775  | NA       | NA     | NA     |
| rs183279686 | 34138771 | T   | G   | intronic   | NA         | NA    | 0.391953           | 0.0665      | NA            | NA           | NA          | 0.0126   | 0.0023   | 0.0169  | NA       | NA     | NA     |
| rs59158919  | 34138993 | G   | A   | intronic   | NA         | NA    | 0.08495            | 0.8602      | 0.4733        | NA           | NA          | 0.0649   | 0.1127   | 0.0775  | NA       | NA     | NA     |
| rs58696677  | 34139217 | G   | A   | intronic   | NA         | NA    | 0.032991           | 0.6699      | 0.6078        | NA           | NA          | 0.0937   | 0.1831   | 0.1064  | NA       | NA     | NA     |
| rs59518134  | 34139278 | A   | C   | intronic   | NA         | NA    | 0.085744           | 0.8672      | 0.4833        | NA           | NA          | 0.0835   | 0.1823   | 0.0775  | NA       | NA     | NA     |
| rs35674959  | 34139840 | C   | T   | exonic     | missense   | P152L | NA                 | NA          | NA            | 0.5686 (AFR) | NA          | 0.0052   | 0.0197   | NA      | 0.005154 | 0.0152 | NA     |
| rs74773419  | 34140501 | A   | G   | intronic   | NA         | NA    | 0.087171           | 0.9265      | NA            | NA           | NA          | 0.0341   | 0.0076   | 0.0716  | NA       | NA     | NA     |
| rs3751124   | 34140951 | T   | C   | intronic   | NA         | NA    | 0.594461           | NA          | NA            | NA           | NA          | 0.0304   | 8.00E-04 | 0.002   | NA       | NA     | NA     |
| rs2957509   | 34141528 | C   | T   | intronic   | NA         | NA    | 0.096692           | 0.8864      | 0.791         | NA           | NA          | 0.869    | 0.6467   | 0.9225  | NA       | NA     | NA     |
| rs75817653  | 34141632 | A   | G   | intronic   | NA         | NA    | 0.089314           | 0.8936      | 0.6029        | NA           | NA          | 0.0749   | 0.1437   | 0.0805  | NA       | NA     | NA     |
| rs73501097  | 34141875 | A   | G   | intronic   | NA         | NA    | 0.094617           | 0.9869      | 0.4192        | NA           | NA          | 0.0907   | 0.2042   | 0.0805  | NA       | NA     | NA     |
| rs11600691  | 34142340 | G   | A   | intronic   | NA         | NA    | 0.081509           | 0.7379      | NA            | NA           | NA          | 0.0074   | 0.0076   | 0.008   | NA       | NA     | NA     |
| rs190123218 | 34143497 | C   | T   | intronic   | NA         | NA    | 0.922389           | 0.2331      | NA            | NA           | NA          | 0.0164   | 0.0023   | 0.0477  | NA       | NA     | NA     |
| rs116940567 | 34144261 | G   | A   | intronic   | NA         | NA    | 0.107186           | 0.7449      | NA            | NA           | NA          | 0.0096   | 0.0023   | 0.0278  | NA       | NA     | NA     |
| rs73500434  | 34144579 | T   | C   | intronic   | NA         | NA    | 0.095499           | 0.9835      | 0.3571        | NA           | NA          | 0.0958   | 0.2239   | 0.0805  | NA       | NA     | NA     |
| rs17700714  | 34144673 | T   | C   | intronic   | NA         | NA    | 0.080721           | 0.9521      | 0.5021        | NA           | NA          | 0.0607   | 0.0968   | 0.0775  | NA       | NA     | NA     |
| rs139800295 | 34145358 | C   | G   | exonic     | missense   | L250V | NA                 | NA          | NA            | NA           | NA          | NA       | NA       | NA      | 0.000231 | 0.0007 | NA     |
| rs2982587   | 34146502 | A   | G   | intronic   | NA         | NA    | 0.10227            | 0.9873      | 0.6429        | NA           | NA          | 0.8702   | 0.6536   | 0.9195  | NA       | NA     | NA     |
| rs59359577  | 34147488 | A   | G   | intronic   | NA         | NA    | 0.089012           | 0.9155      | 0.5993        | NA           | NA          | 0.0605   | 0.0968   | 0.0775  | NA       | NA     | NA     |
| rs148590717 | 34147506 | C   | T   | intronic   | NA         | NA    | 0.601066           | 0.6073      |               |              |             |          |          |         |          |        |        |



**Supplementary Figure I. Meta-Analysis Association Results for All-Stroke: Manhattan and Q-Q Plot.**

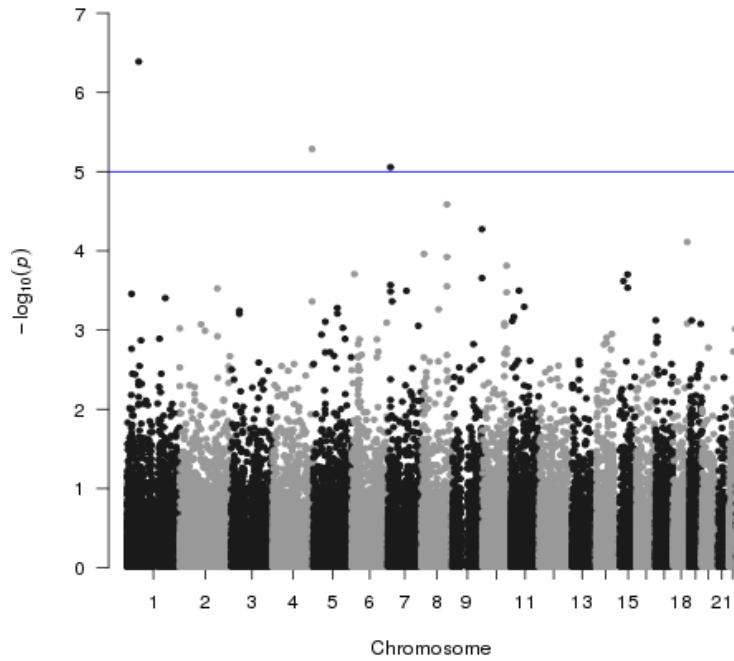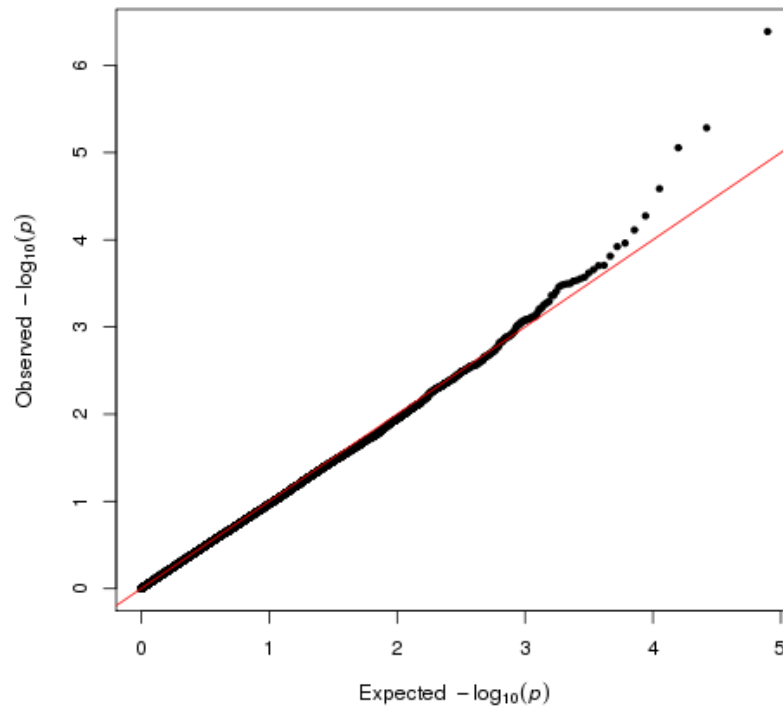

Supplement: NIHMS1620442-supplement-Supplemental_Material.pdf [file NIHMS1620442-supplement-Supplemental_Material.pdf]
